# Supplementary material for: Temporal Comparative Transcriptome Analysis on Wheat Response to Acute Cd Toxicity at the Seedling Stage
Source: MDPI journal article supplement (doi:10.3390/plants12030642), 2023-02-01

**Supplementary Figure S1.** Heatmap for ABA hormone-related genes.

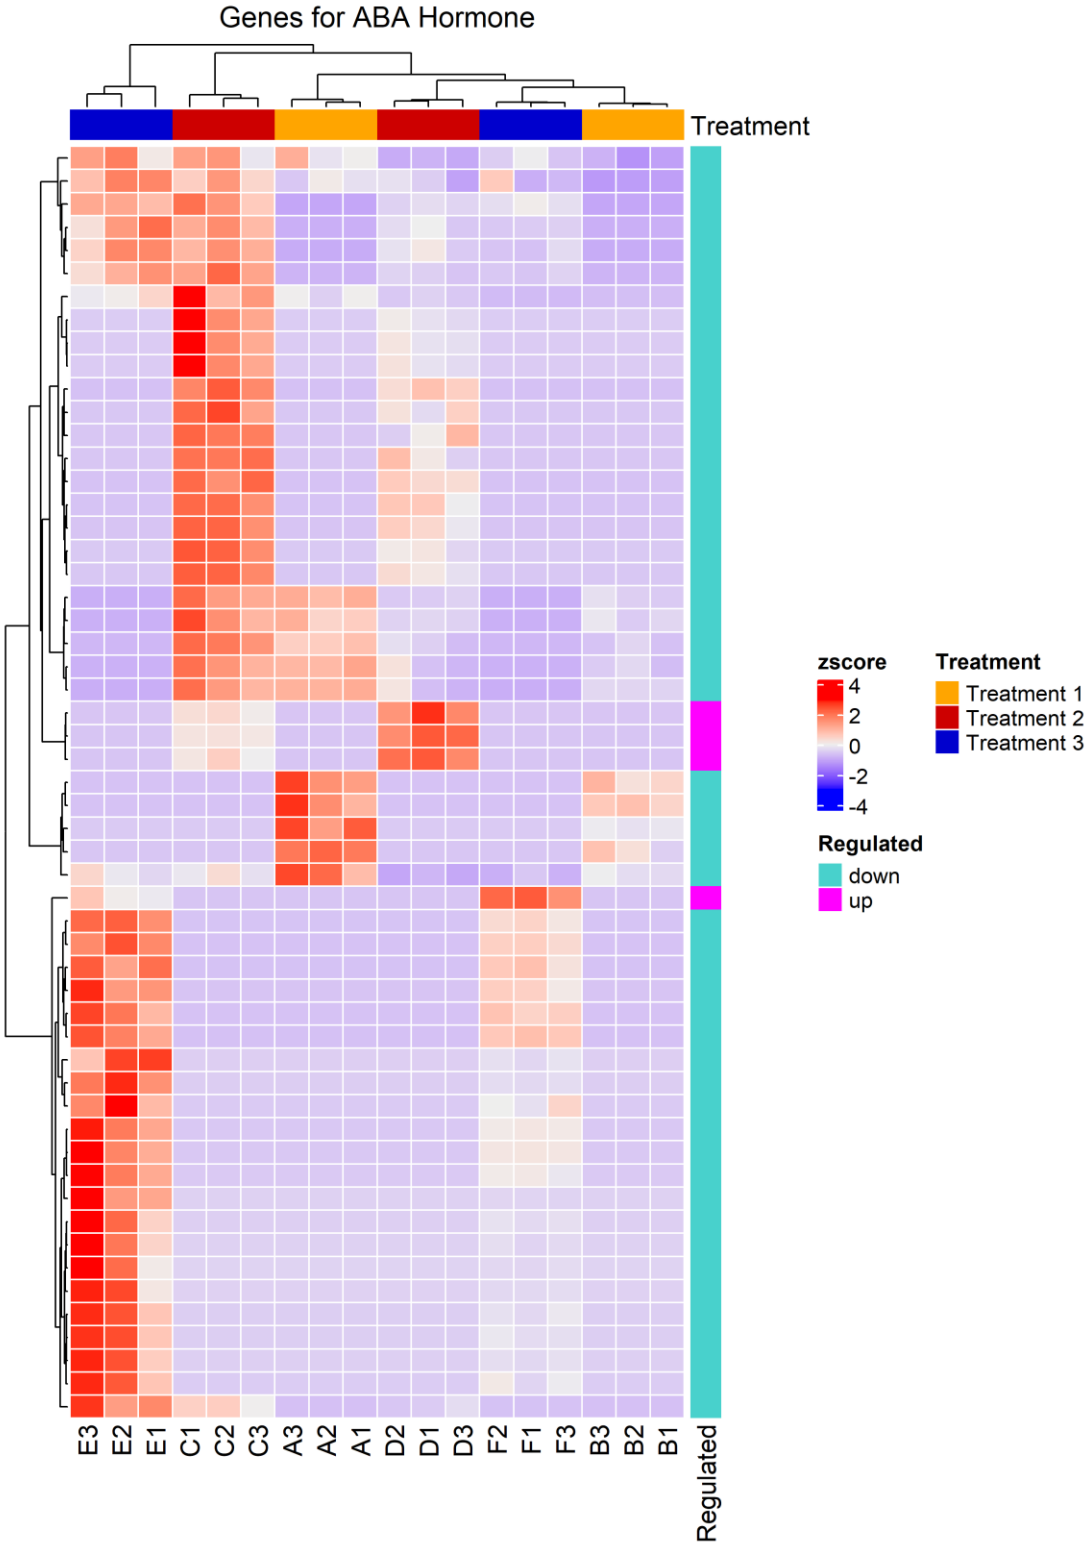

Supplementary Figure S2. Heatmap for Specific heavy metal genes.

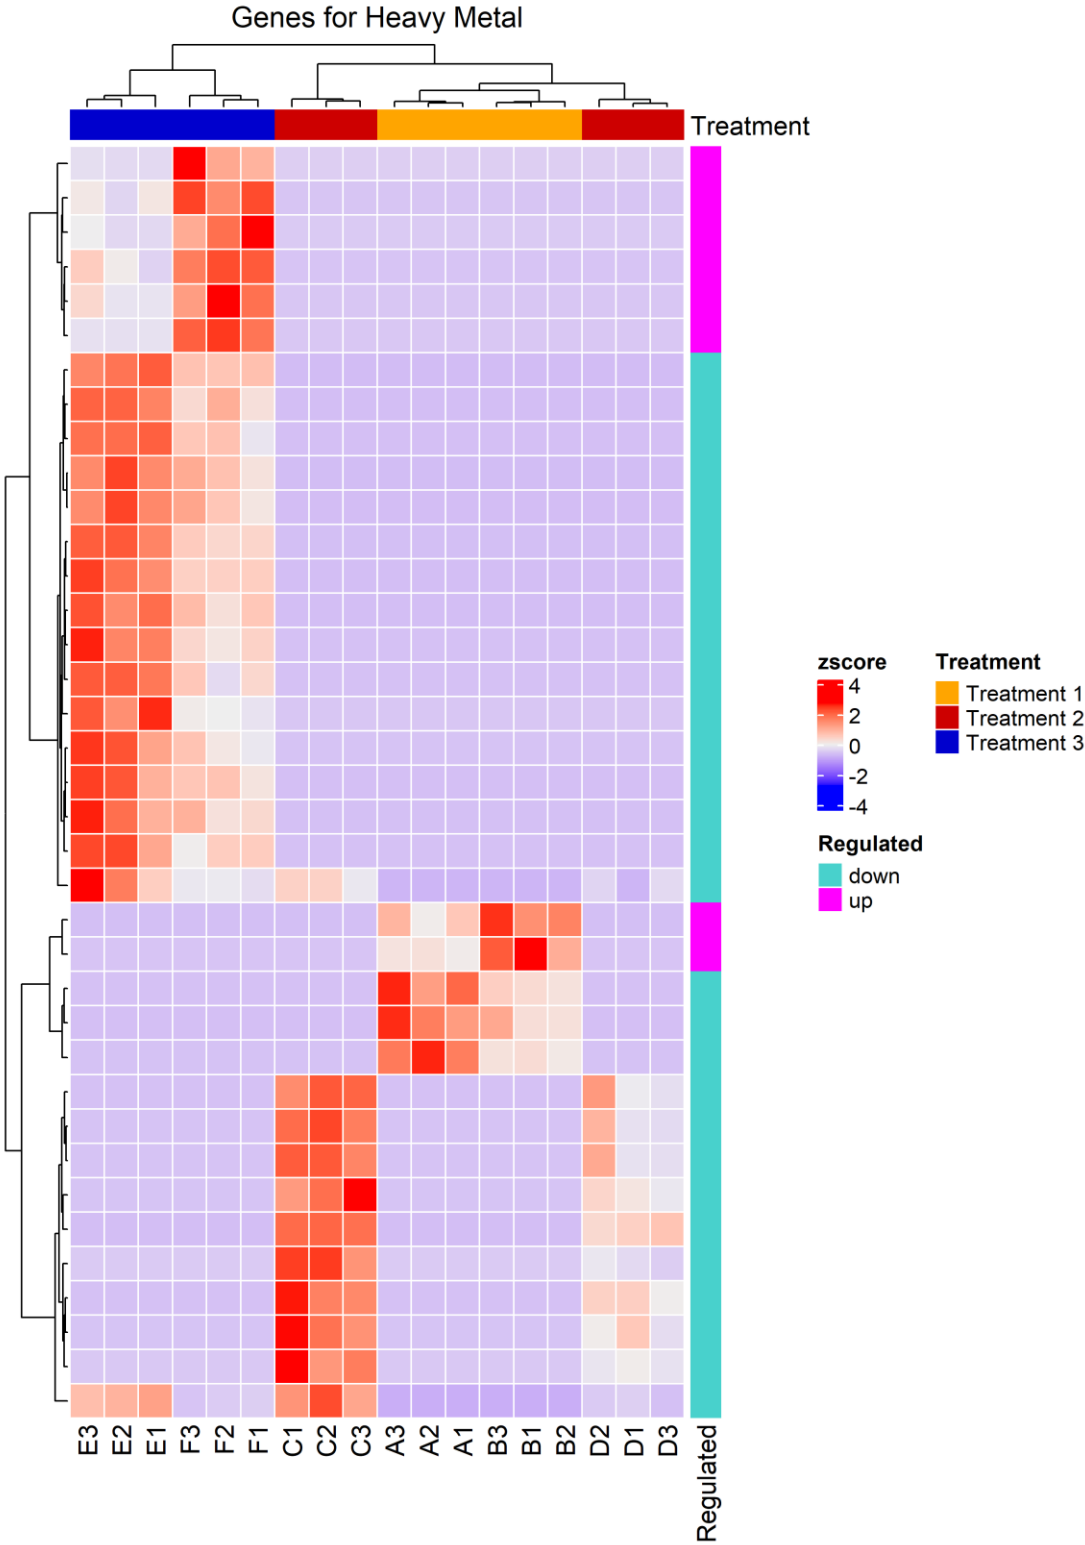

Supplementary Figure S3. Heatmap for Metal ion transport-related genes.

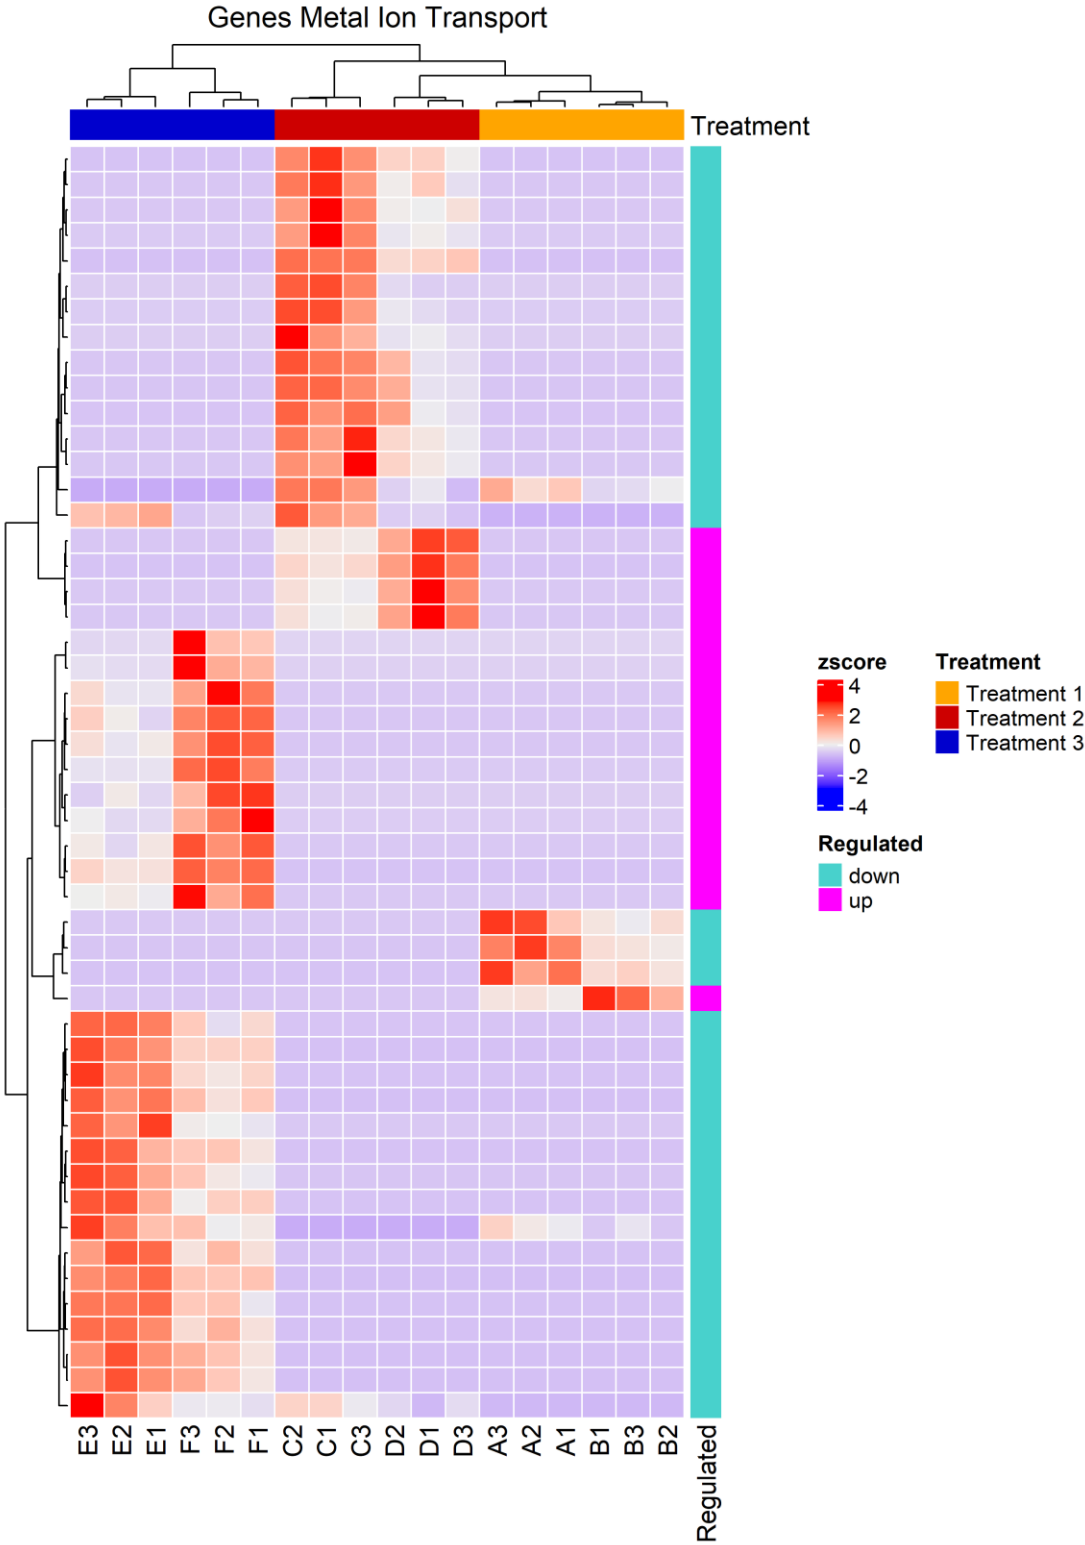

Supplementary Figure S4. Heatmap for Metal ion Auxin related genes.

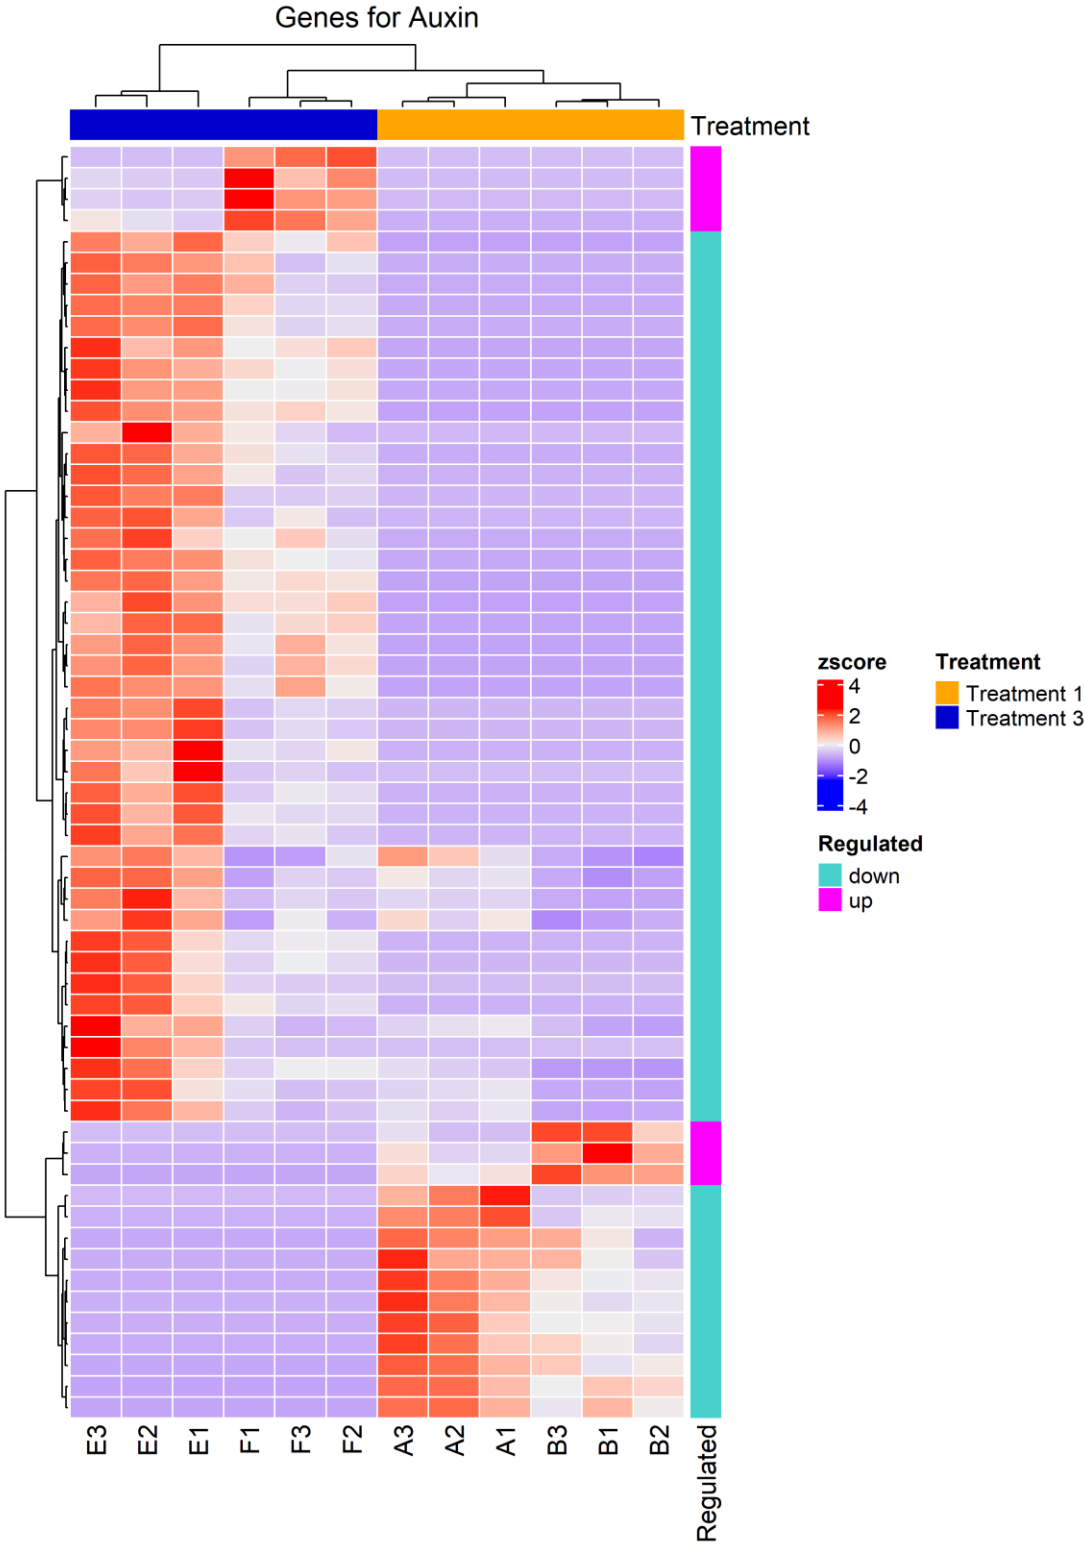

**Supplementary Figure S5.** Heatmap for ABC transporters pathways genes.

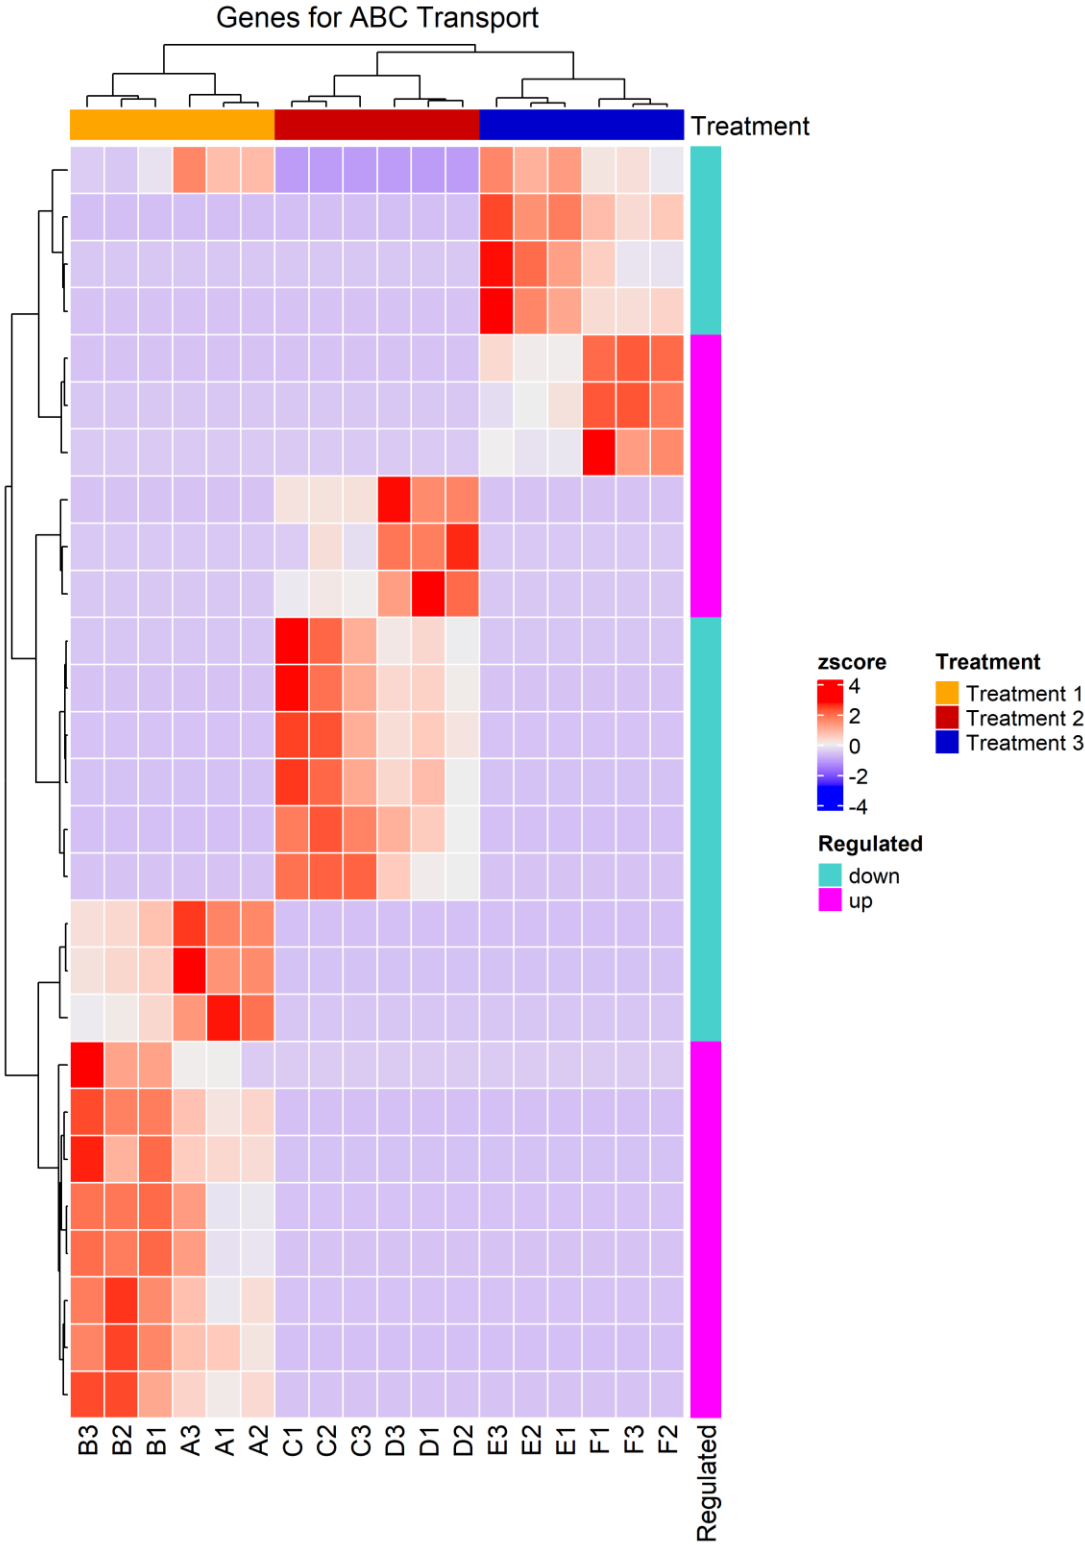

Supplementary Figure S6. Heatmap for Peroxidase activity-related genes.

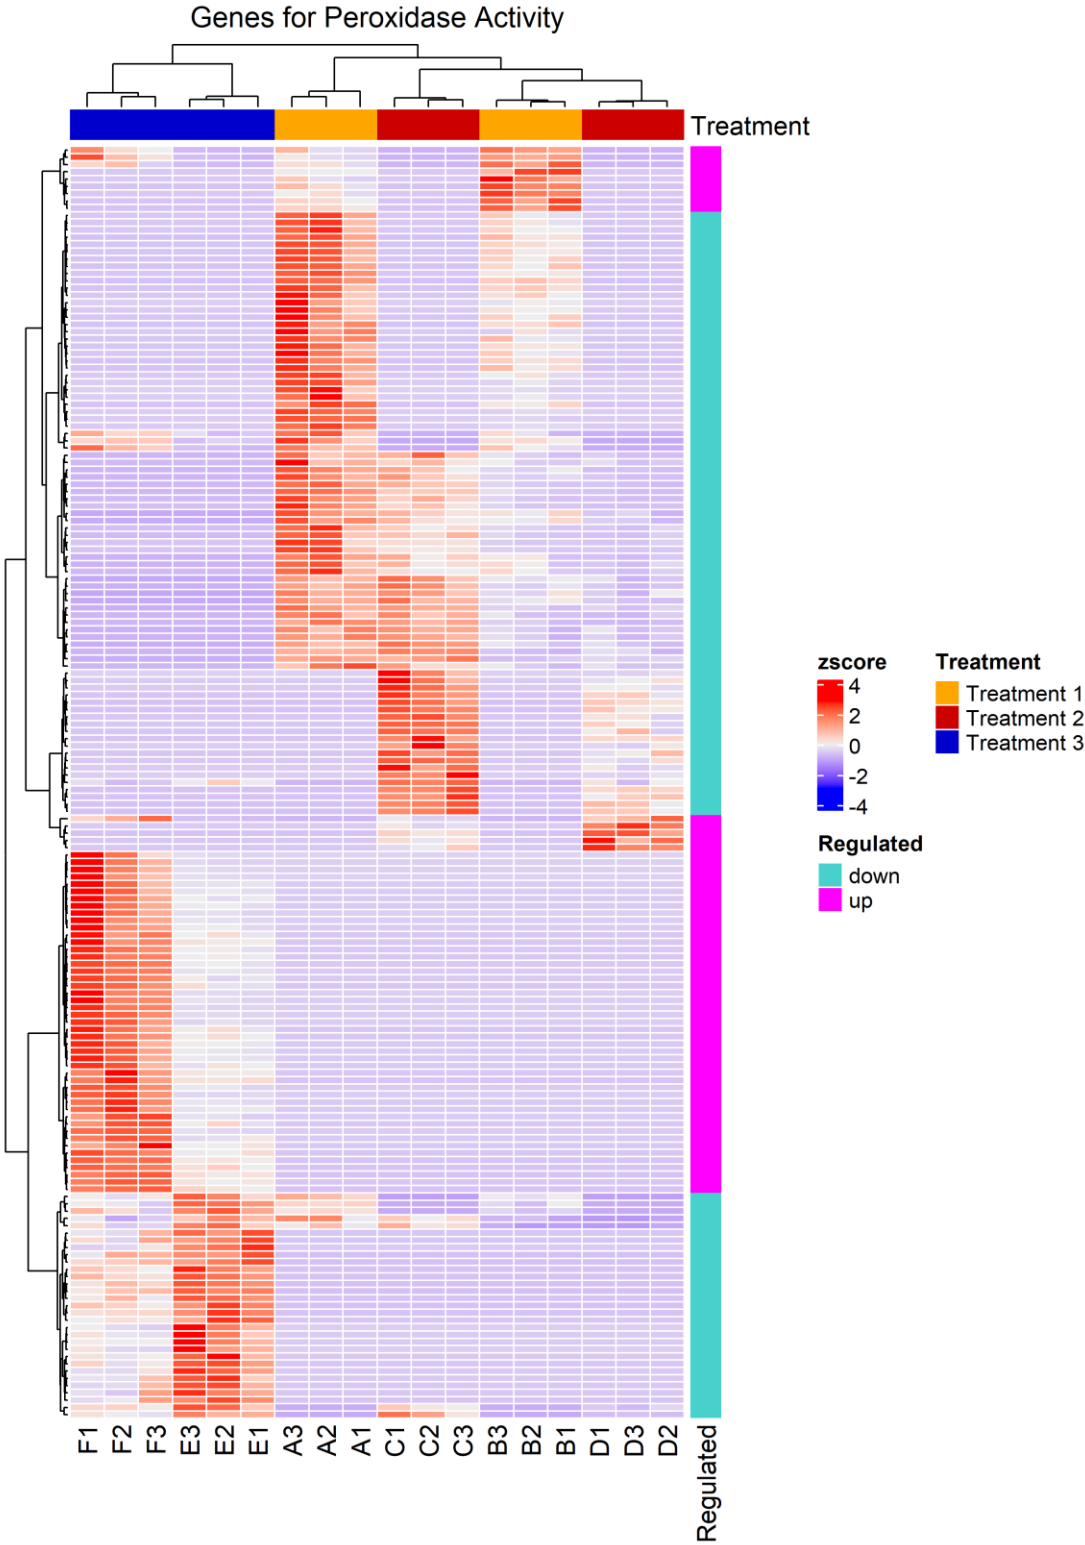

Supplement: s1 [file s1]
